# Supplementary material
Source: publisher figshare collection journal article supplement (https://tandf.figshare.com/ndownloader/files/40554020)
Supplement: Supplementary file 1 [file 40554020]

# Supplementary information


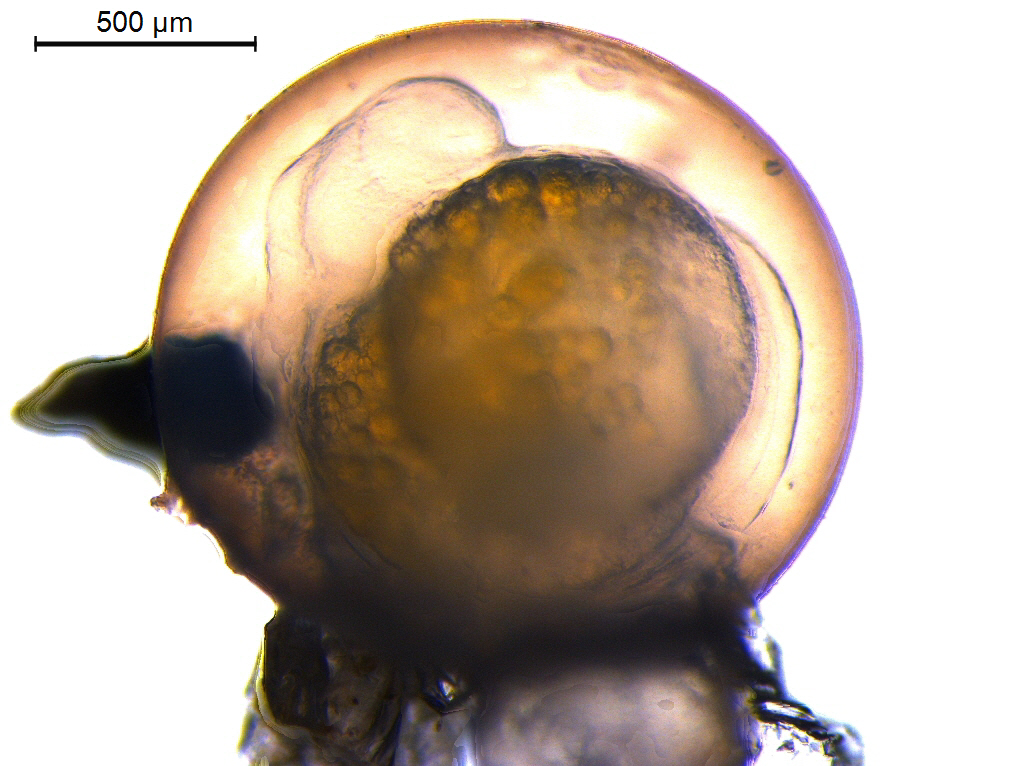


Figure S1: Capelin embryos estimated to be 6 days post fertilization (dpf) at the beginning of the experiment, corresponding with the crack of optic bulb developmental stage, just before the end of organogenesis I (Fridgeirsson 1976).

Figure S2: Incubator setup for the A) exposure (T0 – T19) and B) post-exposure (T19 – T46 days of experiment). During the exposure, the design consisted in a control group (no oil - blue) and four treatment groups, with increasing concentration of crude oil mixed in gravel (0.19, 0.75, 3 and 6 g oil /kg gravel) for the Low (green), Medium (yellow), High (orange) and Extra High (red) groups respectively. Four replicate incubators (2 L) were connected to one gravel-column per treatment, respectively. The placement of the incubators (2 L) could not be fully randomized. During the post-exposure period, the 2 L incubators were placed in 25 L incubators. The flow of seawater is shown by arrows, allowing larvae to swim from the 2 L into the 25 L tank. When hatch was terminated, the 2 L incubators were removed. The placement of the 25 L incubators was fully randomized. The valve on the bottom was used for cleaning purposes.

Figure S3: Concentration (ng/L) of 44 PAHs measured in treatment water for the Extra High (6 g oil/kg gravel) treatment group over time (T0, T4, T10 and T18). Sum 44 PAH concentrations (ng/L) are listed for each timepoint. Parent compounds are indicated with full name, while alkylated homologs are indicated as C1-, C2-, C3- and C4-.

Figure S4: Larval density (larvae per liter) from 35 dpf until 50 dpf, corresponding to 29 to 44 days of experiment. Data were estimated larval densities from the average count of three sub-samples (100 mL). Each mean incubator density (based on 3 subsamples) for each treatment are plotted as dots, and the line connects the overall means.
